# Supplementary material for: The vaccinaTion & Hpv Knowledge (THinK) questionnaire: a reliability and validity study on a sample of women living in Sicily (southern-Italy)
Source: PeerJ. 2019 May 9;7:e6254. doi: 10.7717/peerj.6254 (PMC6511389; doi:10.7717/peerj.6254)
Supplement: Data S1 [file peerj-07-6254-s001.xlsx]

## Sheet: Foglio1
ID	Group	Q1	Q2	Q3	Q4	Q5	Q6	Q7	Q8	Q9	Q10	Q11	Q12	Q13	Q14	Q15	Q16	Age	Education	Place of birth	Place of living
1	O	1	1	2	4	1	4	5	5	2	3	5	3	6	3	4	3	40	2	1	1
2	O	1	1	2	3	1	3	4	5	4	6	5	6	6	6	6	6	51	2	2	2
3	O	1	1	4	3	1	3	4	3	4	3	1	3	4	4	6	6	.	1	1	1
4	O	1	2	4	3	1	3	4	4	3	2	3	2	2	1	3	3	.	3	1	1
5	O	1	1	1	1	1	5	5	6	4	1	4	2	3	1	1	1	36	1	1	1
6	O	1	1	1	4	4	4	1	4	1	1	4	4	1	1	6	6	37	1	1	1
7	O	1	3	4	4	4	1	1	6	5	6	5	5	6	6	1	1	32	1	1	1
8	O	3	3	6	2	4	1	4	6	4	6	6	4	6	6	1	1	60	1	1	1
9	O	1	1	1	4	1	1	1	3	1	1	4	5	3	4	4	4	45	1	1	1
10	O	1	4	1	1	1	1	2	5	1	1	1	1	2	1	1	3	44	1	1	1
11	O	1	4	4	4	4	3	3	4	3	2	4	4	3	5	5	5	40	1	1	1
12	O	1	1	4	4	4	1	1	3	4	1	4	4	1	1	5	5	.	1	1	1
13	O	1	1	1	3	3	4	1	4	5	6	6	6	6	6	6	6	54	1	1	1
14	O	2	1	3	2	1	3	4	3	2	2	2	2	2	2	4	1	49	3	2	2
15	O	1	4	1	4	5	4	4	5	5	5	5	5	1	5	3	4	41	1	1	1
16	O	1	5	5	3	3	1	1	5	3	4	3	3	3	5	5	5	40	2	1	1
17	O	4	4	3	5	5	1	1	3	4	3	4	5	2	2	5	3	38	1	1	1
18	O	1	1	3	3	3	4	4	4	3	2	3	1	3	4	3	4	61	3	1	1
19	O	1	2	1	1	1	4	4	1	1	1	1	1	1	5	5	5	50	1	1	1
20	O	1	2	4	3	4	1	1	5	3	1	3	1	4	5	5	3	36	1	2	2
21	A	1	1	1	1	3	4	4	5	1	1	1	1	2	1	1	1	25	2	2	2
22	O	1	1	5	5	5	1	4	6	5	6	5	5	6	6	6	1	25	0	5	1
23	O	1	3	3	4	1	1	2	2	1	1	1	1	3	5	5	5	.	2	2	2
24	O	1	1	4	3	3	4	4	5	5	5	5	5	5	5	5	5	26	1	1	1
25	O	1	1	2	1	2	4	3	3	1	2	1	1	2	1	2	2	24	2	1	1
26	O	3	1	2	3	3	3	3	3	1	2	1	2	2	1	1	2	25	2	1	1
27	O	3	3	4	5	4	3	1	4	2	1	3	1	3	2	2	1	32	3	1	1
28	O	1	1	1	4	5	1	1	1	5	6	5	5	6	5	5	2	28	1	1	1
29	O	1	1	1	4	5	1	5	6	5	6	5	6	6	6	6	6	52	1	1	1
30	O	1	1	4	4	1	1	3	6	3	1	4	1	1	4	6	6	38	1	1	1
31	O	1	1	1	2	1	2	4	1	1	1	1	1	3	1	3	1	23	2	1	1
32	O	3	2	3	3	1	1	1	4	1	3	3	4	2	4	3	1	52	3	1	1
33	O	1	1	1	3	1	3	2	3	3	3	3	4	2	4	4	3	.	2	1	1
34	O	1	3	4	4	4	3	3	4	4	4	5	5	4	5	4	5	33	2	1	1
35	O	3	1	4	4	4	1	3	4	5	1	5	4	3	3	3	3	31	3	2	2
36	O	3	1	2	4	4	2	4	5	3	2	4	1	2	3	4	3	55		1	1
37	O	3	3	2	4	4	4	5	5	5	6	6	6	6	6	6	6	.	2	1	1
38	O	1	4	5	1	4	4	4	5	5	4	4	5	4	5	5	5	36	1	1	1
39	O	3	3	3	2	1	1	3	5	1	1	1	1	3	5	5	5	52	1	1	1
40	O	3	1	4	4	4	4	4	2	5	4	5	5	4	5	6	1	52	2	1	1
41	O	3	2	4	4	3	3	4	4	3	2	4	4	3	4	4	3	26	3	1	1
42	O	1	1	1	4	4	1	1	5	5	5	4	5	4	1	4	1	31	1	4	1
43	O	1	1	5	4	4	5	1	1	5	5	5	5	5	5	5	5	52	1	2	2
44	O	2	1	2	2	2	4	4	5	2	3	2	3	2	1	1	1	55	2	2	2
45	O	1	1	3	4	1	2	1	4	1	1	1	1	1	3	1	5	42	3	1	1
46	O	1	6	6	1	1	6	6	1	1	6	1	1	6	1	6	6	42	1	5	1
47	O	3	1	4	1	1	6	4	4	5	5	5	5	1	1	5	1	28	1	1	1
48	O	1	1	1	1	1	4	4	4	1	1	1	1	1	1	1	1	44	2	1	1
49	O	1	1	2	4	1	1	3	5	2	1	2	1	3	1	2	1	31	3	1	1
50	O	1	1	1	1	1	3	3	3	1	1	1	1	2	1	2	1	43	3	1	1
51	O	1	1	1	1	1	3	4	1	1	1	1	1	2	1	1	3	24	2	2	2
52	O	1	1	1	1	1	3	4	1	1	1	1	1	1	1	1	3	23	2	2	2
53	O	1	1	1	3	1	5	4	6	3	3	3	3	3	1	1	1	40	2	1	1
54	O	2	2	2	2	2	1	4	4	4	1	4	4	4	4	6	6	55	1	1	1
55	O	2	2	2	4	4	1	4	4	2	2	4	3	2	2	2	1	.	2	1	1
56	O	1	1	2	1	1	4	4	4	1	1	1	1	3	3	2	2	24	2	2	2
57	O	1	1	1	1	1	4	4	4	1	1	1	1	3	1	1	2	24	2	2	2
58	O	1	1	2	1	1	4	3	2	2	1	2	1	1	1	2	1	25	3	1	1
59	O	1	3	3	1	1	1	1	1	1	2	1	1	3	5	5	1	61	2	1	1
60	O	2	1	1	3	4	4	3	4	1	1	1	1	1	1	1	3	28	3	1	1
61	O	1	1	1	3	2	4	1	1	1	1	1	1	2	2	2	3	.
62	O	1	2	1	2	2	2	4	5	5	4	4	4	4	1	6	6	20	2	1	1
63	O	3	2	3	4	3	4	5	5	3	2	4	3	1	1	6	6	.	2	4	4
64	O	2	2	2	2	2	2	2	2	2	2	2	2	2	2	4	2	20	2	1	1
65	O	1	1	1	3	1	4	4	5	5	5	5	5	4	1	1	1	21	2	1	1
66	O	3	1	2	4	4	3	3	4	3	2	4	2	2	1	3	3	23	2	1	1
67	O	4	2	2	4	3	1	4	6	3	2	4	2	4	4	6	6	40	2	2	2
68	O	1	1	4	4	4	4	1	4	5	4	5	5	1	1	1	1	24	1	1	1
69	A	3	2	2	3	2	4	4	3	3	3	4	3	4	1	2	2	21	2	1	1
70	A	1	1	1	3	3	4	4	3	3	3	4	1	3	1	1	1	22	2	1	1
71	A	1	1	1	2	2	4	4	3	3	3	3	3	4	3	3	3	25	3	2	2
72	A	1	1	1	2	2	4	5	1	1	3	3	1	1	1	3	6	.	3	1	1
73	A	1	1	1	1	1	4	4	3	1	1	1	1	1	1	1	1	25	2	1	1
74	A	1	1	1	2	1	4	4	2	1	2	2	2	2	1	1	1	23	2	1	1
75	A	1	1	3	3	1	1	4	5	4	3	5	5	3	1	1	1	19	2	2	2
76	A	1	1	1	2	4	3	1	2	4	2	4	4	4	2	1	3	24	2	2	2
77	A	1	1	1	3	4	4	4	3	1	2	2	1	2	2	5	4	21	2	1	1
78	A	3	1	1	3	3	4	4	3	3	3	4	1	3	3	3	1	25	2	2	2
79	A	1	1	3	3	3	4	4	3	4	3	4	4	3	3	1	3	19	2	2	2
80	A	1	2	3	3	4	1	4	3	4	3	4	4	3	3	3	2	28	3	5	1
81	A	3	2	2	4	4	4	4	3	4	6	5	4	6	3	6	3	25	3	2	2
82	A	1	1	1	3	2	4	4	3	5	3	5	5	3	3	3	3	19	2	1	1
83	A	1	1	1	1	1	4	4	3	1	1	1	1	2	1	3	1	28	2	1	1
84	A	3	3	3	4	3	4	5	3	4	4	5	4	3	3	3	3	21	2	2	2
85	A	1	1	1	4	3	4	4	3	3	2	5	3	2	2	2	2	22	2	1	1
86	A	1	2	3	3	2	4	4	4	1	1	4	1	3	1	1	1	.	2	2	2
87	A	2	1	3	3	1	2	6	6	1	1	1	2	3	3	3	3	24	2	2	2
88	A	1	2	2	4	4	3	6	6	1	2	2	1	2	2	2	2	22	2	2	2
89	A	3	2	3	3	3	4	4	5	3	1	3	2	3	2	2	1	23	2	1	1
90	A	2	1	2	3	2	3	4	6	2	1	1	1	3	1	1	2	23	2	1	1
91	O	1	1	1	1	1	3	2	5	1	1	1	1	1	1	1	1	33	2	1	1
92	A	1	1	1	2	3	4	4	3	3	2	3	4	1	1	2	1	.	2	1	1
93	A	1	1	1	2	1	4	4	3	5	3	5	5	3	2	3	2	25	2	1	1
94	A	3	1	3	4	3	4	4	3	3	3	4	1	1	1	1	1	.	2	2	2
95	A	1	1	1	5	4	4	4	3	5	3	5	5	4	4	3	4	22	2	1	1
96	A	3	1	3	4	4	4	4	4	5	3	6	4	4	1	2	1	23	3	1	1
97	A	1	1	1	1	1	4	4	5	1	2	1	1	2	1	1	1	27	2	2	2
98	A	3	2	2	4	3	4	4	2	3	3	4	3	3	2	2	3	.	2	1	1
99	O	1	1	1	3	3	3	4	5	3	2	5	4	3	1	3	1	.	3	1	1
100	A	1	3	3	3	4	2	4	5	4	1	5	5	3	4	2	4	21	2	1	1
101	A	1	1	1	3	3	4	4	4	4	3	4	4	3	3	2	3	19	2	2	2
102	A	2	1	1	3	2	4	4	3	3	2	4	3	3	3	3	1	21	2	2	2
103	A	1	1	1	1	1	4	4	1	1	1	1	1	2	1	3	1	26	3	2	2
104	A	1	1	1	3	1	5	4	4	2	1	4	2	2	3	2	3	20	2	1	1
105	A	1	1	1	1	1	4	2	2	1	1	1	1	1	1	1	1	30	2	1	1
106	A	3	2	2	4	3	2	4	3	5	6	5	5	6	6	6	1	27	3	2	2
107	A	3	1	1	3	4	4	4	3	4	1	3	4	3	4	3	4	21	2	1	1
108	A	3	1	3	4	3	1	3	4	3	1	4	3	2	3	3	1	22	2	1	1
109	A	3	3	3	4	3	3	3	6	4	2	4	3	3	2	2	3	23	2	1	1
110	A	1	1	1	2	1	4	1	3	3	3	4	1	3	1	2	4	21	2	1	1
111	A	1	1	2	3	2	4	3	4	4	3	4	4	3	2	3	2	21	2	1	1
112	A	1	1	2	3	2	4	4	3	3	2	2	1	2	1	2	2	24	2	1	1
113	A	2	1	1	3	3	4	4	4	3	2	4	1	2	1	1	2	21	2	1	1
114	A	1	1	1	3	2	4	4	4	3	2	3	4	3	1	3	2	24	2	1	1
115	A	1	1	2	1	3	3	4	3	1	1	3	3	3	3	3	4	21	2	2	2
116	A	2	3	4	4	3	1	4	3	2	3	4	3	3	4	3	4	21	2	1	1
117	O	1	1	1	3	2	3	2	3	2	2	4	5	2	2	1	2	.	2	1	1
118	A	1	2	2	3	2	1	3	4	2	2	2	2	2	1	2	2	21	2	1	1
119	A	3	3	3	3	3	1	4	5	3	3	3	3	3	4	4	3	22	2	1	1
120	A	3	1	4	4	3	4	1	3	3	3	4	3	3	4	4	3	23	3	1	1
121	A	1	1	1	1	1	4	4	2	1	1	1	1	3	1	1	3	24	2	2	2
122	A	1	1	1	1	1	4	5	5	1	3	1	1	3	2	1	1	24	2	2	2
123	A	1	1	1	1	1	3	3	1	1	1	1	1	1	1	1	1	27	2	1	1
124	O	1	1	1	1	1	4	3	5	1	1	1	1	1	1	2	1	.	2	2	2
125	A	1	2	2	5	5	3	1	2	1	1	1	1	2	3	3	5	.	3	4	4
126	A	1	1	1	2	2	2	1	2	1	1	2	1	2	1	2	1	.	3	4	4
127	A	1	1	2	5	3	4	4	4	2	2	3	1	4	2	3	5	.	3	4	4
128	A	1	1	1	3	3	4	4	4	4	3	4	4	3	2	1	1	23	2	2	2
129	A	1	1	1	3	3	4	4	4	1	2	4	1	2	1	1	1	23	2	1	1
130	A	1	2	2	2	1	2	3	2	2	2	2	2	2	2	3	3	24	2	1	1
131	A	1	1	2	3	1	3	3	4	3	2	2	3	3	3	3	3	24	2	1	1
132	A	3	4	3	4	1	5	5	1	4	3	4	4	3	4	3	1	23	2	1	1
133	A	1	1	3	5	2	5	4	5	5	3	5	5	3	3	3	2	26	2	1	1
134	A	1	1	2	3	1	3	1	4	1	2	3	1	2	1	3	2	24	2	1	1
135	A	2	2	2	2	2	4	4	6	4	4	6	5	6	3	4	3	18	2	2	2
136	A	2	3	3	4	3	4	4	6	4	3	4	4	3	3	3	3	24	2	1	1
137	A	3	1	1	3	3	4	4	4	3	2	4	4	3	1	2	1	24	2	1	1
138	A	6	6	6	6	6	6	6	5	4	2	2	2	2	1	1	1	25	2	1	1
139	A	1	1	1	2	2	5	4	4	2	2	2	1	2	1	2	2	22	3	1	2
140	A	1	1	3	1	1	4	4	4	1	1	1	1	1	3	3	1	27	3	1	2
141	A	1	1	1	1	1	4	4	4	1	2	2	1	1	1	1	1	21	2	1	1
142	A	2	4	4	4	4	2	3	2	1	2	4	4	2	4	4	1	25	3	1	1
143	O	1	1	1	3	2	4	3	5	1	3	4	3	3	3	2	2	.	3	1	1
144	O	3	4	3	4	2	3	3	5	4	1	3	4	2	3	5	3	29	1	2	2
145	O	1	2	4	3	1	4	5	5	3	1	3	4	1	2	2	1	27	3	2	2
146	O	1	1	1	2	3	3	5	5	3	1	4	5	5	4	5	3	39	3	1	1
147	O	2	2	5	3	4	1	5	5	4	1	3	4	1	2	2	2	30	1	1	1
148	O	3	3	3	4	3	1	5	3	4	2	5	4	5	4	5	1	29	1	1	1
149	O	3	1	5	3	1	2	5	5	4	3	3	1	1	1	4	1	36	3	2	2
150	O	1	1	2	1	1	5	5	5	1	2	1	2	1	1	1	1	44	3	1	1
151	O	2	1	2	2	1	4	4	4	2	2	3	2	1	1	1	1	32	3	1	1
152	O	2	2	3	5	1	2	1	1	4	1	4	4	1	2	2	1	41	2	1	1
153	O	2	2	4	1	1	2	2	4	3	4	4	3	2	3	4	2	33	2	2	2
154	O	3	4	3	4	3	1	4	4	4	4	5	4	2	2	4	2	27	1	1	1
155	O	1	1	2	2	1	4	4	4	2	1	2	2	1	2	2	1	35	3	1	1
156	O	2	2	4	3	1	3	4	3	4	3	2	4	2	3	3	1	39	2	1	1
157	O	4	3	5	4	4	4	5	5	3	3	4	4	3	4	5	3	50	1	1	1
158	A	2	1	3	3	2	5	5	4	3	3	3	4	4	4	5	4	26	2	2	2
159	A	3	3	5	3	4	3	4	5	4	4	5	4	4	5	5	4	22	2	1	1
160	A	1	1	1	1	2	4	4	3	2	1	1	1	3	3	1	1	26	2	1	1
161	O	3	1	3	4	1	4	1	5	4	1	5	1	4	1	1	1	37	1	1	1
162	O	1	3	1	5	1	5	4	5	5	6	5	5	6	1	1	1	26	1	1	1
163	O	3	1	5	5	1	1	3	5	5	5	5	5	5	4	5	1	29	1	1	1
164	O	3	4	2	4	1	2	1	4	5	3	5	5	3	1	1	1	22	1	1	1
165	O	1	2	2	1	2	3	1	4	1	2	2	1	3	1	1	1	27	1	1	1
166	O	3	3	4	4	3	4	3	3	3	2	4	4	2	4	3	2	28	2	1	1
167	O	1	3	3	1	1	4	1	6	1	1	1	1	2	1	1	1	50	2	1	1
168	A	1	2	2	4	3	5	3	6	1	2	2	4	3	1	1	1	19	2	1	1
169	O	3	2	3	3	3	4	4	3	2	3	2	3	2	2	3	2	34	2	1	1
170	O	2	2	4	3	3	2	2	4	2	2	3	2	2	4	4	3	30	2	1	1
171	O	3	2	4	2	2	5	5	3	2	2	2	3	3	3	3	2	18	2	1	1
172	O	1	1	1	3	1	4	4	4	1	1	1	1	1	1	1	1	39	3	1	1
173	O	1	1	2	2	1	5	5	5	1	1	1	1	1	1	1	1	30	3	1	1
174	O	1	1	1	2	1	1	4	5	1	5	1	1	1	2	1	1	37	2	1	1
175	O	1	1	1	3	1	4	1	5	4	3	5	3	4	1	1	1	44	3	1	1
176	O	1	1	3	1	1	4	2	6	1	1	1	1	1	1	1	1	41	2	1	1
177	O	1	1	1	5	1	1	1	4	1	1	1	5	3	1	1	1	29	1	1	1
178	O	3	3	1	4	3	1	5	3	3	2	4	3	3	4	4	1	29	1	1	1
179	O	1	1	1	1	1	4	3	3	1	1	1	1	2	1	1	1	24	3	1	1
180	O	3	4	1	4	4	1	1	5	4	3	4	4	4	5	3	5	33	1	1	1
181	O	2	2	4	4	2	4	1	1	4	3	2	2	3	2	1	1	31	2	1	1
182	O	1	1	3	1	3	4	4	1	1	1	1	1	1	1	1	1	24	3	1	1
183	O	2	2	1	4	3	2	2	5	4	2	5	5	3	4	4	2	39	1	2	2
184	O	3	1	3	3	1	4	4	5	4	3	4	5	4	2	1	4	33	2	1	1
185	O	4	4	5	4	3	3	5	5	4	3	5	5	3	5	5	3	28	1	1	1
186	O	4	2	2	4	1	4	4	4	4	6	5	5	6	6	1	1	29	1	1	1
187	O	3	4	5	4	5	3	4	5	2	3	3	5	2	4	4	3	29	3	1	1
188	O	2	1	2	2	1	3	4	1	2	2	2	3	2	1	2	1	42	3	1	1
189	O	1	3	5	3	1	3	1	5	1	4	5	4	4	5	3	1	37	3	1	1
190	O	1	4	3	4	3	3	4	3	4	4	5	4	4	3	1	1	36	2	3	3
191	O	1	1	2	4	1	4	4	5	1	1	1	1	4	5	2	1	34	1	1	1
192	O	1	1	1	4	1	4	2	4	1	1	1	1	1	1	1	1	41	3	1	1
193	O	1	1	1	1	1	5	5	5	1	1	1	1	4	1	1	1	39	2	1	1
194	O	1	1	3	3	1	4	1	1	4	1	3	2	3	3	1	2	37	3	1	1
195	O	1	1	3	3	1	5	1	5	1	1	6	1	1	1	1	1	36	2	1	1
196	O	1	1	3	2	1	5	4	6	2	4	4	3	4	2	3	2	36	2	1	1
197	O	3	1	5	4	1	5	5	5	4	1	2	4	1	1	1	1	34	1	1	1
198	O	1	1	3	1	1	4	5	4	2	3	3	4	3	2	2	1	33	3	1	1
199	O	1	1	1	4	5	6	1	4	1	4	1	5	3	1	1	1	29	1	3	3
200	O	4	4	2	3	5	2	5	5	4	4	4	4	3	3	3	2	37	1	1	1
201	O	2	2	1	4	4	2	5	5	4	2	1	1	1	1	4	2	29	1	1	1
202	O	4	4	4	4	4	2	1	1	3	3	4	4	2	3	4	4	23	2	1	1
203	O	3	4	1	4	4	1	1	1	4	4	4	4	3	4	4	4	31	1	1	1
204	O	2	1	1	1	2	4	3	4	2	1	2	4	1	1	1	1	27	3	2	2
205	O	2	2	2	3	3	3	4	5	2	1	3	3	1	1	1	1	33	2	2	2
206	O	2	1	1	3	2	1	4	3	1	1	2	2	1	1	1	1	35	3	3	1
207	O	3	2	1	2	3	1	5	5	3	1	3	3	1	3	4	1	31	2	1	1
208	O	3	4	2	3	4	1	1	1	4	4	4	4	4	1	2	2	33	1	1	1
209	O	1	1	1	1	1	4	4	4	1	2	1	1	3	2	3	3	31	3	1	1
210	O	1	1	1	3	1	4	4	3	3	3	4	5	3	1	5	1	61	2	1	1
211	A	2	1	4	3	4	5	4	4	3	1	1	3	1	1	1	1	26	2	2	2
212	A	3	2	2	3	4	5	5	5	1	1	2	2	2	2	1	1	22	2	1	1
213	A	2	2	1	4	4	2	2	5	3	3	1	2	2	1	4	3	24	2	1	1
214	A	2	4	4	4	4	1	1	1	4	4	2	2	2	1	1	1	23	2	1	1
215	A	1	1	1	1	1	2	2	3	1	2	2	2	3	4	4	4	19	2	1	1
216	A	4	2	1	5	5	5	5	3	2	3	4	3	1	1	1	1	22	2	1	1
217	A	3	1	1	5	5	5	1	5	3	3	3	3	3	3	4	1	24	2	1	1
218	A	3	1	1	4	5	5	5	5	3	3	3	4	1	2	4	1	21	2	1	1
219	A	3	3	3	1	1	2	2	2	3	3	1	1	1	1	5	2	25	2	1	1
220	O	1	1	2	2	2	3	4	4	4	1	1	2	2	1	1	1	34	3	3	3
